# Supplementary material
Source: publisher site journal article supplement (https://www.dovepress.com/article/456545)
Supplement: Supplementary file 1 [file get_supplementary_file.php]

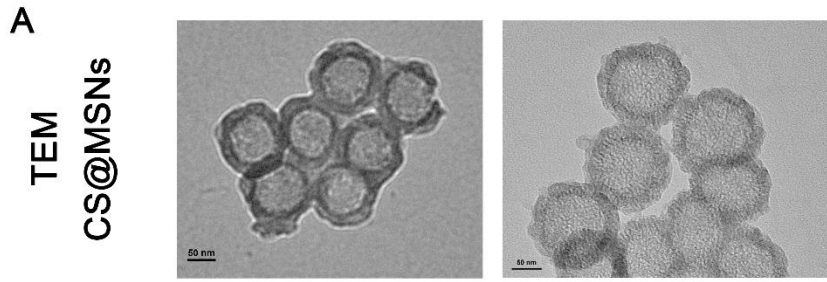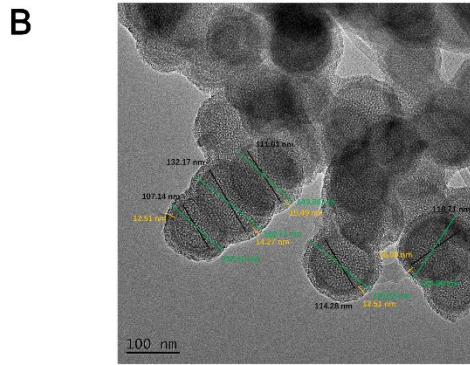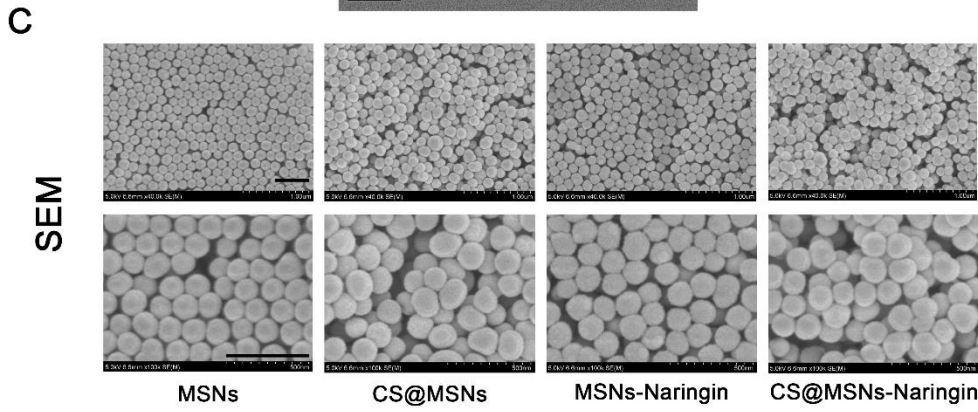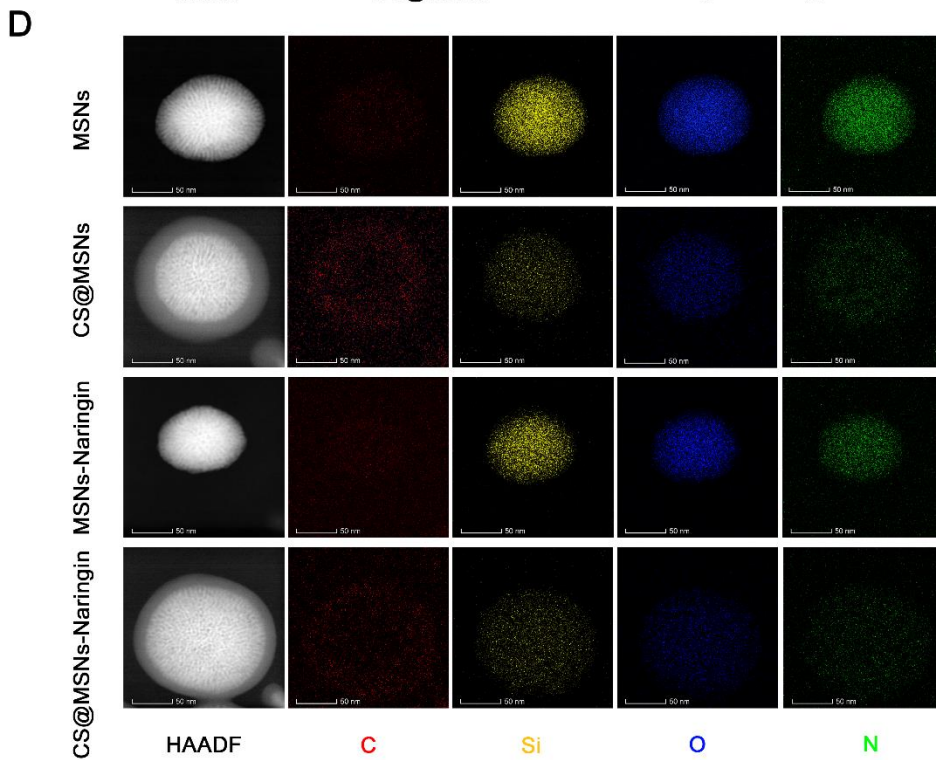

**Supplementary Figure 1.** Complementary characteristic analysis of nanoparticles. **(A)** TEM of CS@MSNs. Scale bar = 50 nm. **(B)** Chitosan thickness measurement. The black line is the diameter of MSNs, the green line is the diameter of CS@MSNs-Naringin, and the yellow line is the thickness of chitosan. **(C)** SEM representative figures of different nanoparticles. Scale bar = 500 nm. **(D)** TEM-EDS of different nanoparticles. Scale bar = 50 nm.

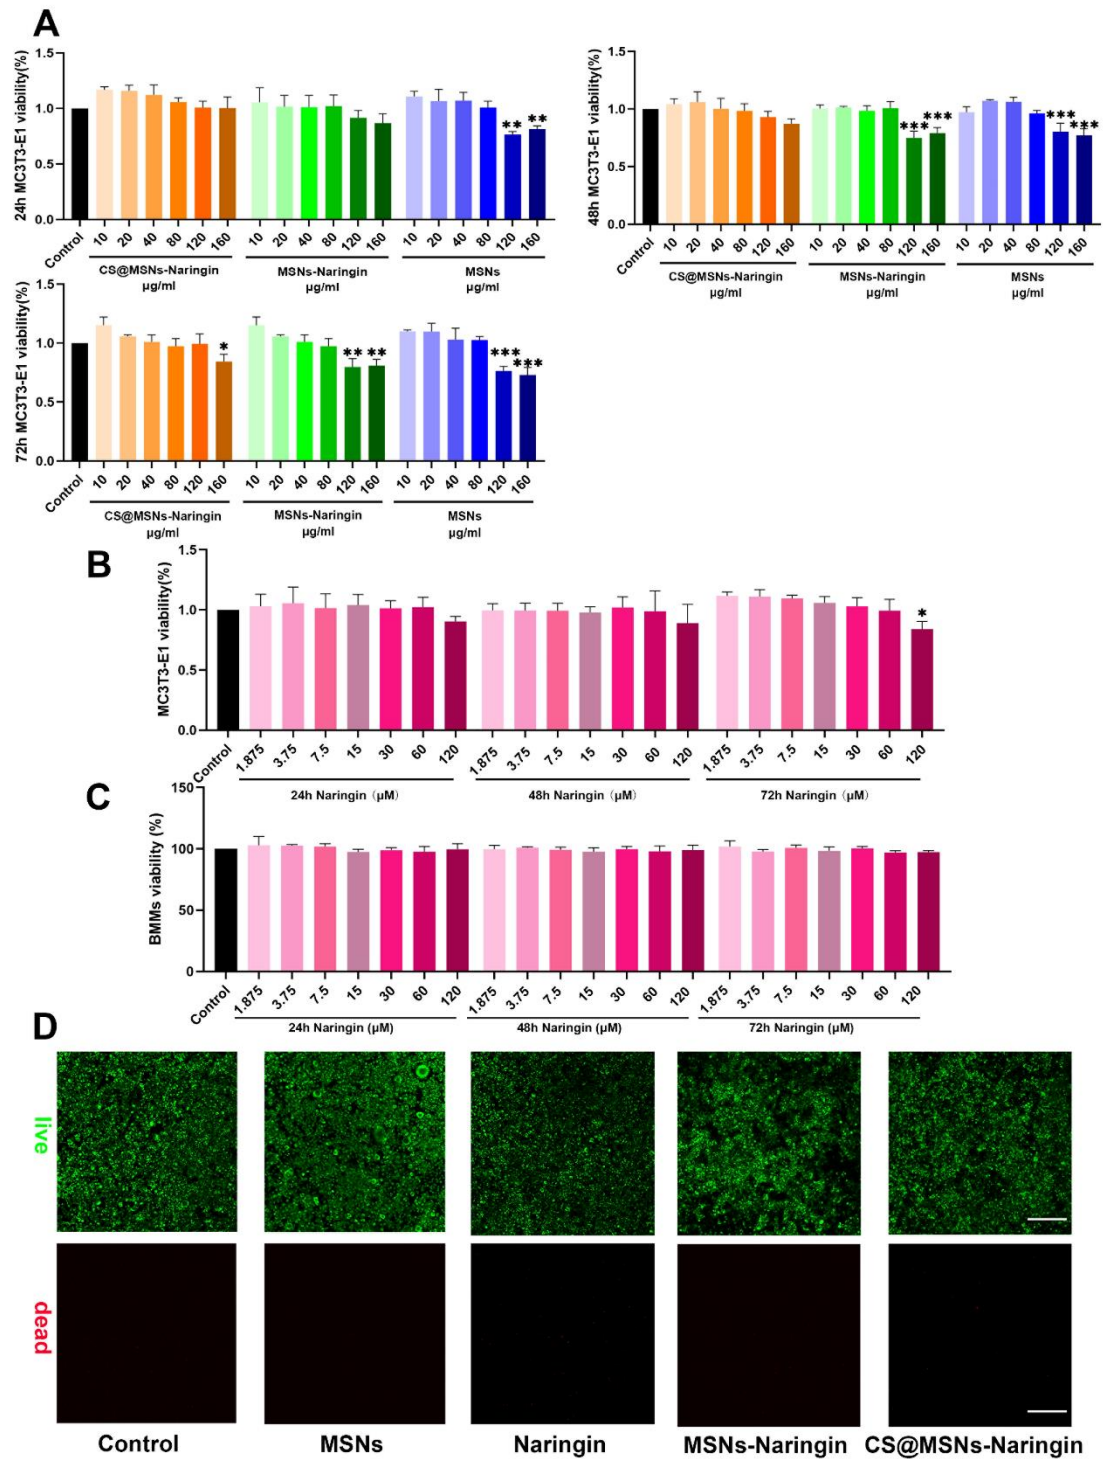

**Supplementary Figure 2.** Cytotoxicity of nanoparticles and naringin for the BMMs and MC3TC-E1. **(A)** Cytotoxicity of CS@MSNs-Naringin, MSNs-Naringin, and MSNs to MC3TC-E1 at 24, 48, 72h. **(B and C)** Cytotoxicity of Naringin to MC3TC-E1 and BMMs at 24, 48, 72h. \*:  $p < 0.05$ ; \*\*:  $p < 0.01$ ; \*\*\*:  $p < 0.001$  compared to the control group. **(D)** Results of dead/alive

staining of BMMs by naringin and different nanoparticles. Living cells are labeled green and dead cells are labeled red. Scale bar = 200  $\mu$ m.

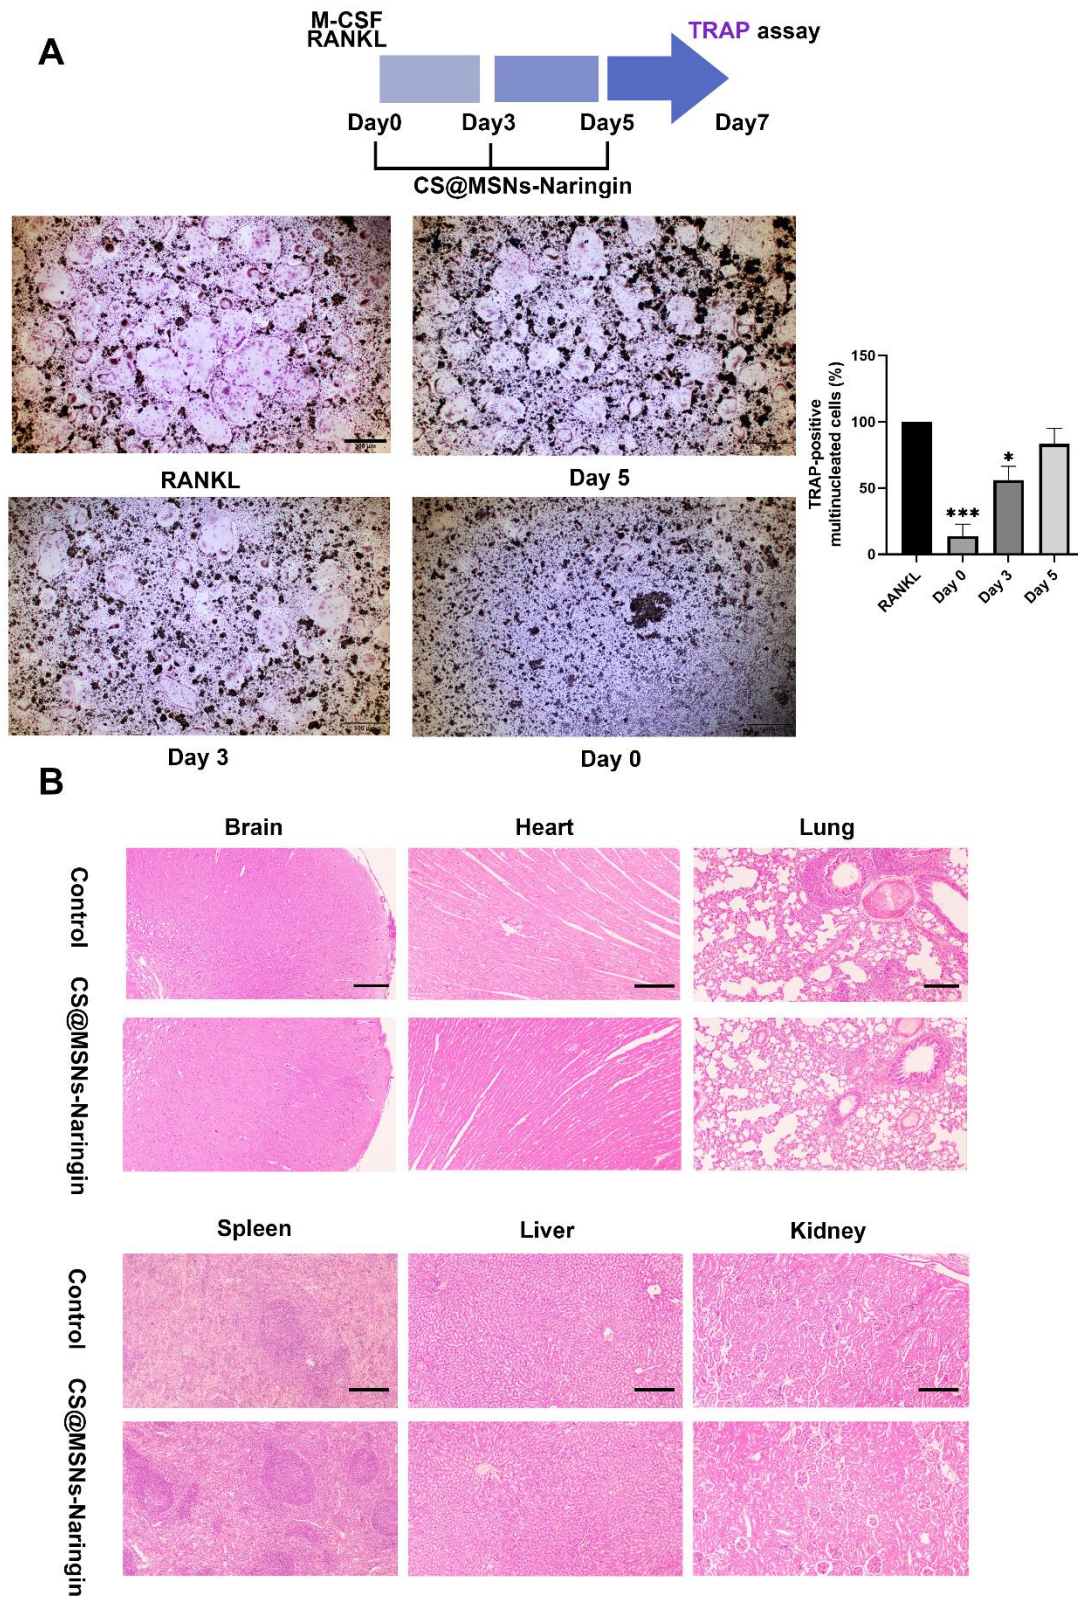

**Supplementary Figure 3.** The specific time period of CS@MSNs-Naringin inhibition of

osteoclast formation and in vivo biosafety. **(A)** BMMs were incubated with 50 ng/ml M-CSF and 100 ng/ml RANKL plus 80  $\mu$ g/mL CS@MSNs-Naringin addition at the indicated time points (day 0, 3, or 5). Cells were fixed and TRAP staining was performed. Scale bar = 500  $\mu$ m. \*:  $p < 0.05$ ; \*\*\*:  $p < 0.001$  compared to the RANKL group. **(B)** HE staining of major metabolic organs in rats. Scale bar = 400  $\mu$ m.

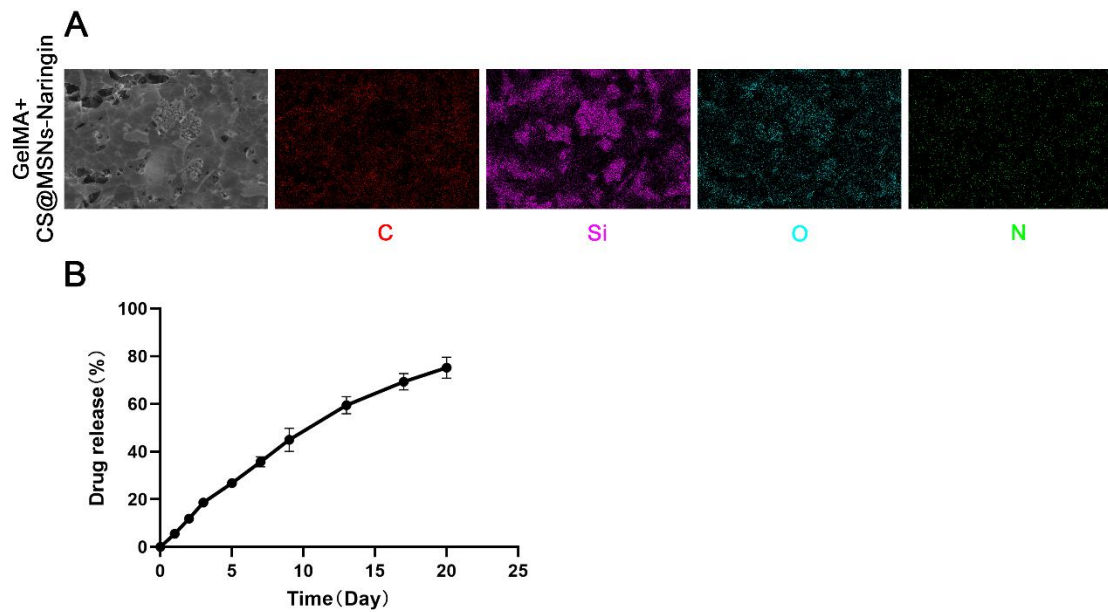

**Supplementary Figure 4.** Complementary characteristic analysis of GelMA. **(A)** TEM-EDS of GelMA+CS@MSNs-Naringin. **(B)** Cumulative release of naringin in GelMA+CS@MSNs-Naringin.

Supplementary Table 1 Real-time PCR primers

| Genes       | Forward primer            | Reverse primer           |
|-------------|---------------------------|--------------------------|
| c-Fos       | GTACTGTAGTCCTTCAGCGTCAATG | ATGTCGAAAGACCTCAGGGTAGAA |
| TRAP        | GTCGGCTTCTTCTCCAATCAG     | CTTATCCTCACAGCTTGTCCAG   |
| Cathepsin K | GAGTTGACTTCCGCAATCCTTAC   | CAGAAACTTGAACACCCACATCC  |
| DC-STAMP    | GCTGTGGACTATCTGCTGTATCG   | ACACTGAGACGTGGTTTAGGAATG |
| NFATc1      | CATCCTTGCCTGCCCTTGAC      | GCTGCCTTCCGTCTCATAGTG    |
| GAPDH       | CCTACCCCAATGTGTCCGTC      | GTAGCCAAGATGCCCTTCAGT    |
